# Supplementary material
Source: MDPI journal article supplement (https://www.mdpi.com/2073-4433/14/12/1711)
Supplement: s1 [file s1]

# Supplementary Materials: Land-Use Regression Analysis of Summer Tropospheric Ozone Concentrations in Ireland

Keelan McHugh <sup>1,\*</sup>, Thomas Cummins <sup>1</sup> and Julian Aherne <sup>2</sup>

**Table S1.** Average co-located passive and active ozone data ( $\mu\text{g}/\text{m}^3$ ) for Clonskeagh (CSK) and Kilkenny (SVL) and the reduction as % of the passive value used to calibrate the passive results.

| Exposure | Passive | Active | Difference | Passive % reduction |
|----------|---------|--------|------------|---------------------|
| 1        | 66.2    | 47.1   | 19.1       | 29                  |
| 2        | 67.3    | 49.5   | 17.9       | 27                  |
| 3        | 68.9    | 54.5   | 14.4       | 21                  |
| Average  | 67.5    | 50.4   | 17.1       | 25                  |

**Table S2.** Predictor variable values used in final model.

| Site           | Dist. Coast (m) | Dist. IPC (m) | Rain (mm/year) | Forest 500 buffer ( $\text{m}^2$ ) | Water 1000 buffer ( $\text{m}^2$ ) |
|----------------|-----------------|---------------|----------------|------------------------------------|------------------------------------|
| Athlone        | 65357           | 20326         | 947            | 185471                             | 1392874                            |
| Ballinamore    | 47259           | 3027          | 1231           | 249134                             | 42600                              |
| Belmullet      | 165             | 31400         | 1295           | 25847                              | 1570489                            |
| Belmullet east | 4772            | 18794         | 1497           | 5208                               | 22794                              |
| Bray           | 2198            | 583           | 878            | 53566                              | 10369                              |
| Carnsore point | 156             | 15489         | 797            | 98190                              | 1211847                            |
| Castlebar      | 17163           | 1811          | 1367           | 175892                             | 170652                             |
| Clare          | 13664           | 26180         | 1290           | 149741                             | 155143                             |
| Clonskeagh     | 2268            | 3586          | 750            | 98592                              | 38226                              |
| Cloone         | 55743           | 11897         | 1084           | 174631                             | 109687                             |
| Cork           | 46413           | 14890         | 1104           | 202969                             | 6586                               |
| Donegal        | 13114           | 28318         | 1920           | 21731                              | 32917                              |
| Dublin Airport | 4065            | 338           | 752            | 76269                              | 10535                              |
| Emo            | 68396           | 5037          | 846            | 304051                             | 85051                              |
| Galway         | 22580           | 17922         | 1127           | 60782                              | 434                                |
| Glanmire Road  | 17293           | 835           | 1065           | 81507                              | 221969                             |
| Henry street   | 71308           | 1595          | 995            | 63367                              | 444666                             |
| Kerry          | 14488           | 11038         | 1497           | 704588                             | 5543                               |
| Kilkenny       | 40200           | 3797          | 889            | 103150                             | 17618                              |
| Kilkitt        | 33286           | 9154          | 1067           | 65154                              | 3484                               |
| Louth          | 13181           | 8255          | 811            | 45376                              | 4194                               |
| Mace Head      | 118             | 59707         | 1334           | 0                                  | 1851288                            |
| Mohill         | 52286           | 6748          | 1092           | 114950                             | 11092                              |
| Palmerstown    | 6929            | 79            | 763            | 249193                             | 106543                             |
| Rathmines      | 3662            | 3363          | 733            | 18904                              | 15649                              |
| Sligo          | 10342           | 15325         | 1213           | 72716                              | 45                                 |
| Tipp north     | 48876           | 13196         | 938            | 55090                              | 20559                              |
| Tipp south     | 27781           | 17518         | 1145           | 114966                             | 38117                              |
| Valentia       | 574             | 308           | 1570           | 84053                              | 434185                             |
| Waterford      | 9682            | 291           | 1031           | 26497                              | 3805                               |
| West Cork      | 8255            | 14475         | 2090           | 170725                             | 17799                              |
| Westmeath      | 54833           | 7579          | 951            | 61785                              | 52584                              |
| Wexford        | 16034           | 6072          | 1056           | 48925                              | 2349                               |
| Wicklow        | 30583           | 26262         | 1493           | 595145                             | 0                                  |

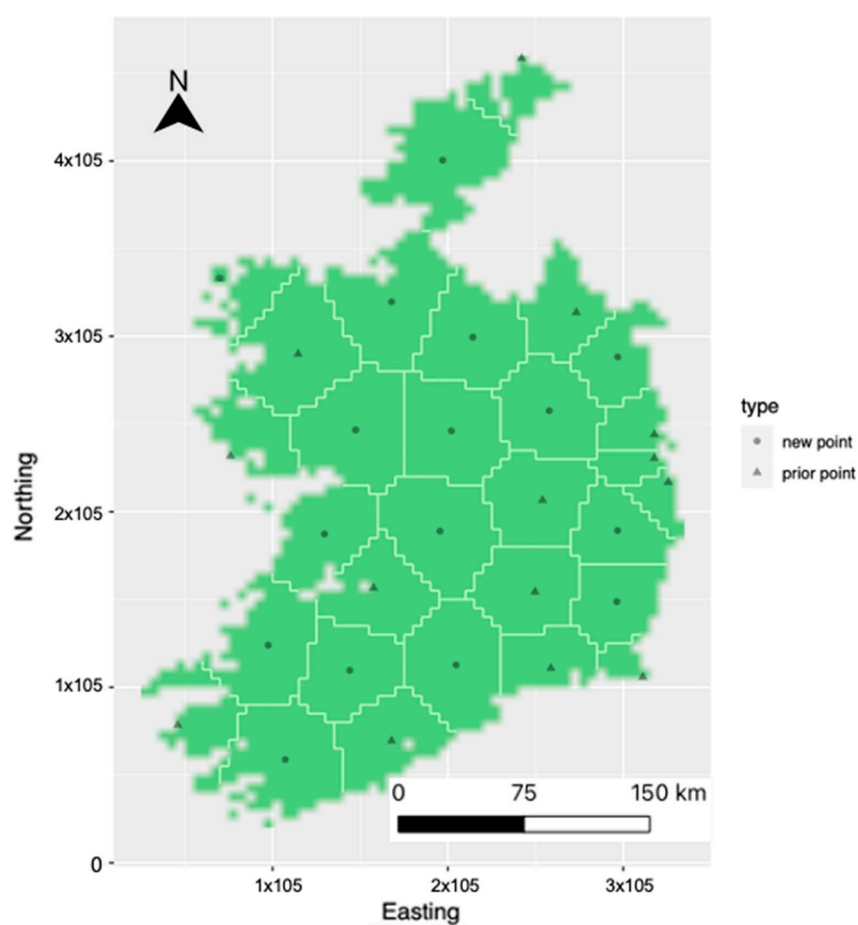

**Figure S1.** The 16 existing monitoring stations (triangles) and 14 new sampling sites (circles). New sample points were chosen from the centre of spatially balanced strata that were mapped using k-means clustering in R (SPCOSA package; [36]).

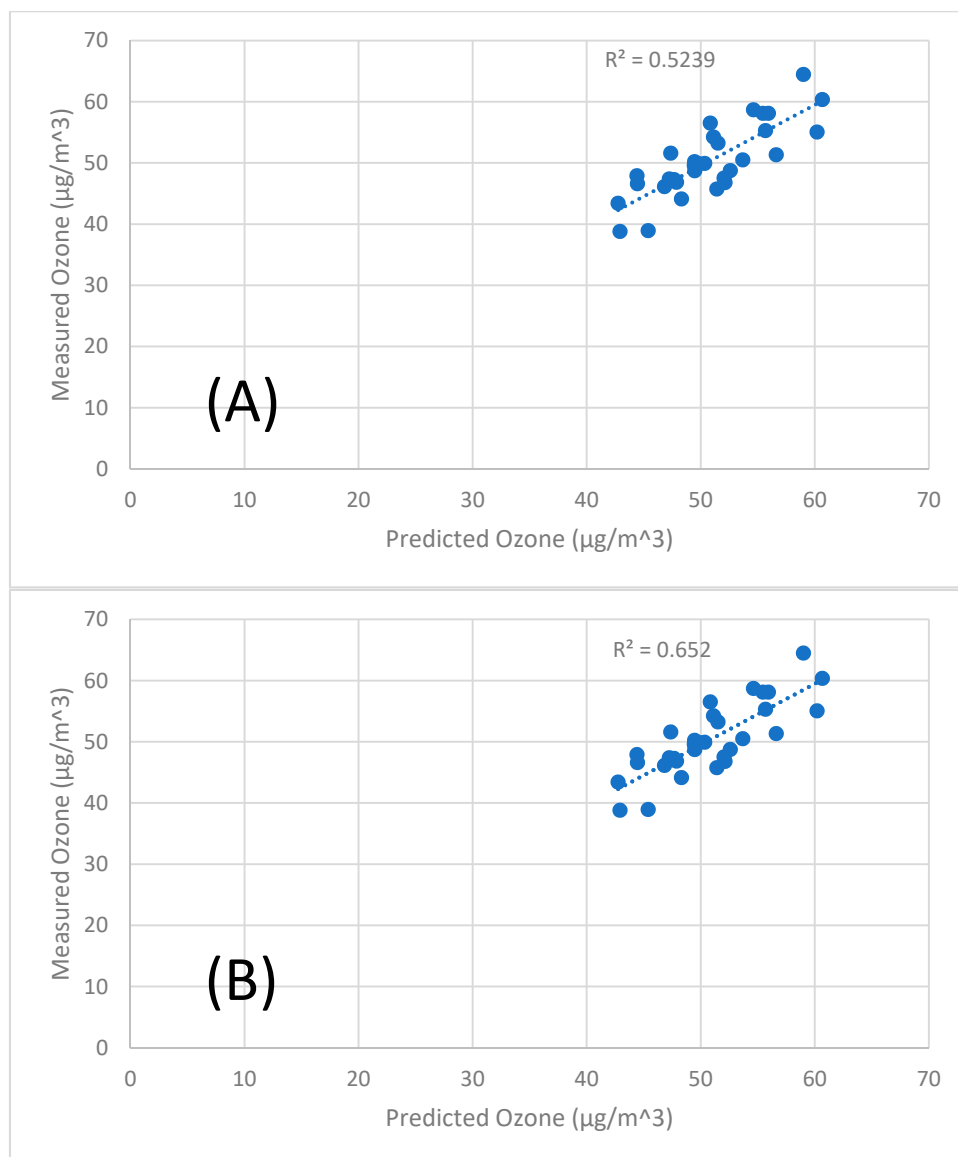

**Figure S2.** Scatter plot and  $R^2$  values of predicted and measured ozone with Waterford site included (A) and Waterford site removed (B).

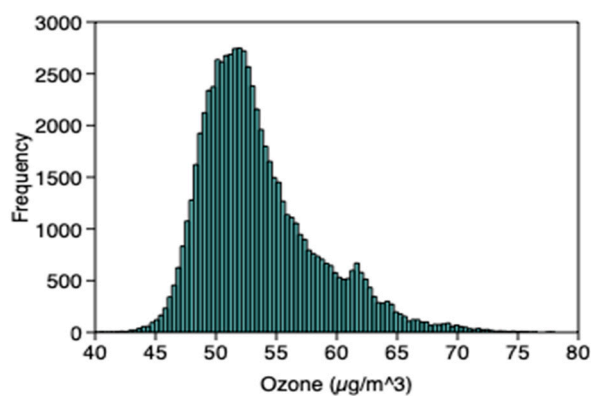

**Figure S3.** Frequency distribution of modelled ozone data ( $\mu\text{g}/\text{m}^3$ ) for summer 2022.
